# Supplementary material for: An engineered protein antagonist of K-Ras/B-Raf interaction
Source: PubMed Central journal article supplement (PMC5517481; doi:10.1038/s41598-017-05889-7), 2017-07-19
Supplement: 41598_2017_5889_MOESM1_ESM.pdf [file 41598_2017_5889_MOESM1_ESM.pdf]

## Supplementary Information

### **An engineered protein antagonist of K-Ras/B-Raf interaction**

Monique J. Kauke,<sup>1,2†</sup> Michael W. Traxlmayr<sup>1,2†</sup>, Jillian A. Parker<sup>3†</sup>, Jonathan D. Kiefer<sup>4</sup>, Ryan Knihtila<sup>3</sup>, John McGee<sup>5</sup>, Greg Verdine<sup>5,6,7</sup>, Carla Mattos<sup>3</sup>, and K. Dane Wittrup<sup>1,2,8\*</sup>

<sup>1</sup> Department of Chemical Engineering, Massachusetts Institute of Technology, Cambridge, MA 02139, USA

<sup>2</sup> Koch Institute for Integrative Cancer Research, Massachusetts Institute of Technology, Cambridge, MA 02139, USA

<sup>3</sup> Department of Chemistry and Chemical Biology, Northeastern University, Boston, Massachusetts 02115, USA

<sup>4</sup> Department of Chemistry and Applied Biosciences, Institute of Pharmaceutical Sciences, Swiss Federal Institute of Technology, Zurich, Switzerland

<sup>5</sup> Department of Chemistry and Chemical Biology, Harvard University, Cambridge, MA 02138, USA

<sup>6</sup> Department of Stem Cell and Regenerative Biology, Harvard University, Cambridge, MA 02138, USA

<sup>7</sup> Department of Molecular and Cellular Biology, Harvard University, Cambridge, MA 02138, USA

<sup>8</sup> Department of Biological Engineering, Massachusetts Institute of Technology, Cambridge, MA 02139, USA

† These authors contributed equally to this work.

\* Corresponding author: [wittrup@mit.edu](mailto:wittrup@mit.edu)

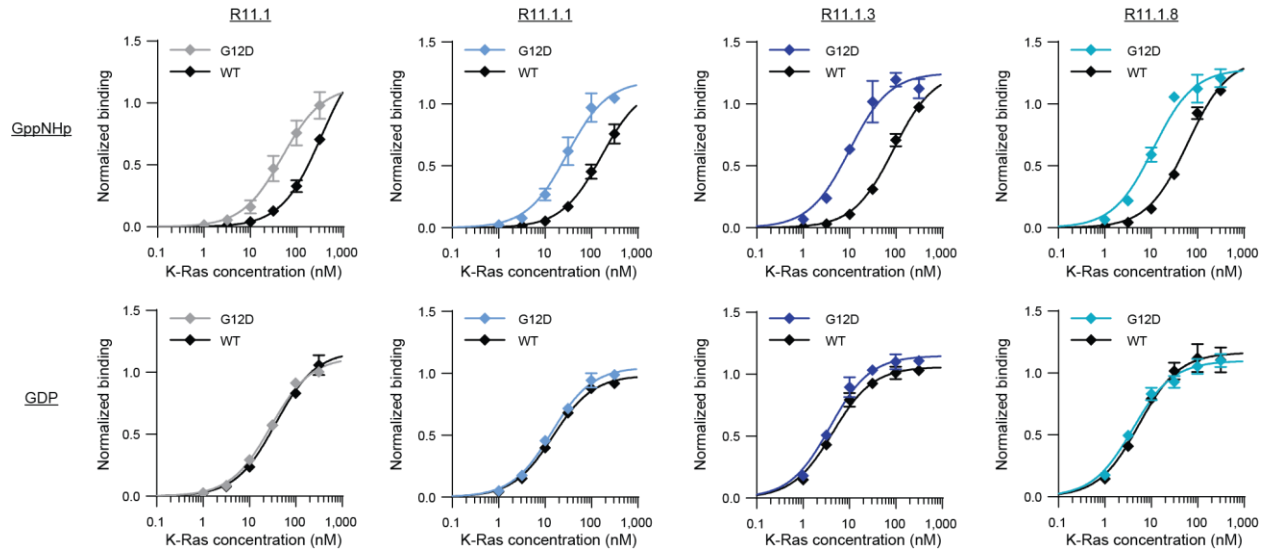

**Extended Data Figure 1. Parental Sso7d R11.1 and affinity matured clones exhibit mutant-specific binding to K-Ras.** Yeast surface display titrations with K-Ras loaded with GDP and the non-hydrolyzable GTP analog GppNHp. Error bars represent SEM of  $n = 3$  independent binding experiments.

**Extended Data Table 1. Data collection and refinement statistics (molecular replacement)**

|                                     | K-Ras G12D(GppNHp)/R11.1.6<br>5UFQ | K-Ras WT(GppNHp)/R11.1.6<br>5UFE              |
|-------------------------------------|------------------------------------|-----------------------------------------------|
| <b>Data collection</b>              |                                    |                                               |
| Space group                         | C121                               | P2 <sub>1</sub> 2 <sub>1</sub> 2 <sub>1</sub> |
| Cell dimensions                     |                                    |                                               |
| $\alpha, b, c$ (Å)                  | 119.7, 42.7, 100.2                 | 48.7, 64.7, 74.5                              |
| $\alpha, \beta, \gamma$ (°)         | 90, 113.3, 90                      | 90, 90, 90                                    |
| Resolution (Å)                      | 2.20                               | 2.30                                          |
| $R_{\text{merge}}$                  | 10.2                               | 12.9                                          |
| $I/\sigma(I)$                       | 21.8 (4.5)                         | 16.6 (5.7)                                    |
| Completeness (%)                    | 98% (94%)                          | 98% (98%)                                     |
| Redundancy                          | 7.3 (6.5)                          | 6.7 (7.0)                                     |
| <b>Refinement</b>                   |                                    |                                               |
| Resolution (Å)                      | 45.17-2.20 (2.28-2.20)             | 40.77-2.30 (2.38-2.30)                        |
| No. reflections                     | 173,684 (14,914)                   | 71,673 (7,517)                                |
| $R_{\text{work}} / R_{\text{free}}$ | 20.0/26.3                          | 18.4/24.1                                     |
| No. atoms                           | 3702                               | 1882                                          |
| Protein                             | 3510                               | 1733                                          |
| Ligand/ion                          | 74                                 | 46                                            |
| (specify/describe)                  |                                    |                                               |
| Water                               | 118                                | 95                                            |
| $B$ factors                         | 41.9                               | 22.3                                          |
| Protein                             | 42.1                               | 22.4                                          |
| Ligand/ion                          | 31.2                               | 18.3                                          |
| Water                               | 40.9                               | 22.4                                          |
| R.m.s. deviations                   |                                    |                                               |
| Bond lengths (Å)                    | 0.009                              | 0.008                                         |
| Bond angles (°)                     | 1.15                               | 1.06                                          |

<sup>a</sup> Values in parentheses are for highest-resolution shell.

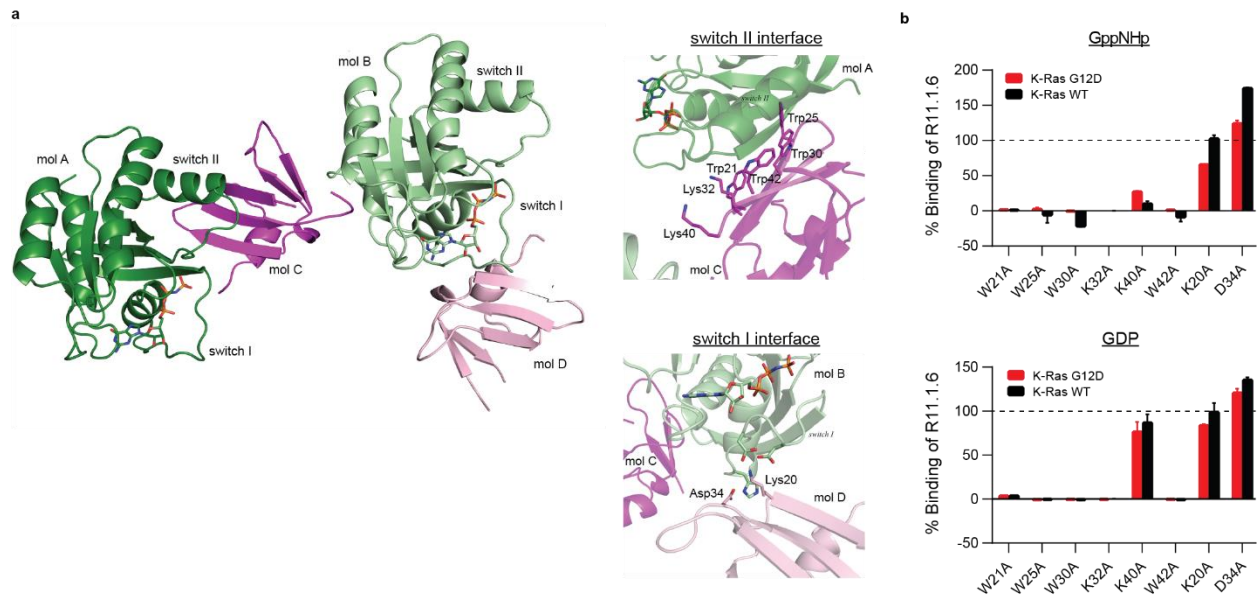

**Extended Data Figure 2. R11.1.6 binds switch II of K-Ras G12D.** **a**, Global view of the R11.1.6/K-Ras G12D co-crystal structure, containing four molecules in the asymmetric unit. Molecules A (K-Ras G12D, green) and C (R11.1.6, magenta) interact at the switch II region, while molecules B (K-Ras G12D, green) and D (R11.1.6, magenta) bind at switch I. On the right, major residues involved in each binding interaction are indicated. **b**, Binding as measured by yeast surface display of R11.1.6 mutants of the residues involved in both switch I and switch II interactions indicated in **a** to K-Ras (10 nM). Binding has been normalized to non-mutated R11.1.6 binding. Error bars represent SEM of  $n = 3$  binding experiments.

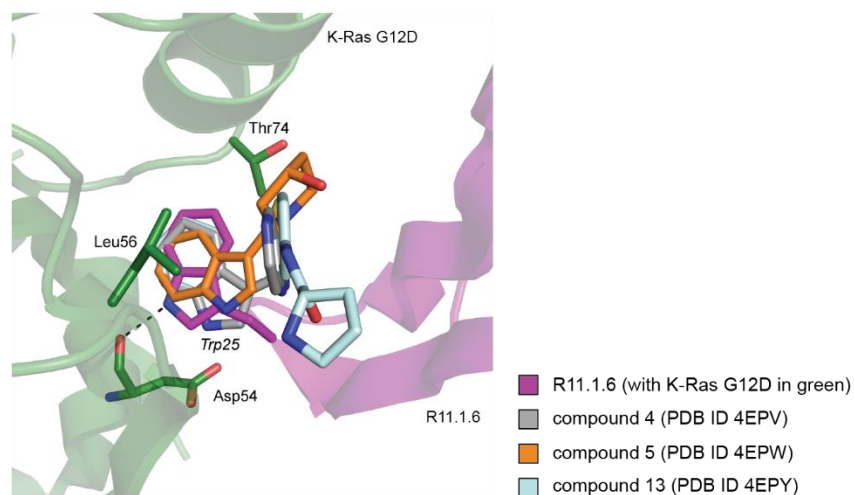

**Extended Data Figure 3. R11.1.6 exhibits similar binding to small molecules against K-Ras.**

Overlay of the co-crystal structure of R11.1.6 with K-Ras G12D with structures of K-Ras in complex with small molecules compound 4 (PDB ID 4EPV), compound 5 (PDB ID 4EPW), and compound 13 (PDB ID 4EPY)<sup>14</sup>, showing the striking similarity in binding position of the indole moieties of the small molecules and the R11.1.6 Trp25 residue. K-Ras G12D residues are indicated in regular font.

**a**

|         | 1                                         | 10                   | 20 | 30 | 40 | 50 | 60 |
|---------|-------------------------------------------|----------------------|----|----|----|----|----|
| R11.1   | ATVKFTYQGEEKQVDISKIKWIRWGQYIWFKYDEDGGAKG  | WGYVSEKDAPKELLQMLGKQ |    |    |    |    |    |
| R11.1.6 | ATVKFTHQGEEKQVDISKIKWIRWGQYIWFKYDEDGGAKG  | WGYVSEKDAPKELLQMLKKR |    |    |    |    |    |
| YW1     | ATVKFTYQGEEKQVDISKIKWIRWGQWIVFYKYDEDGGAKG | WGYVSEKDAPKELLQMLGKQ |    |    |    |    |    |

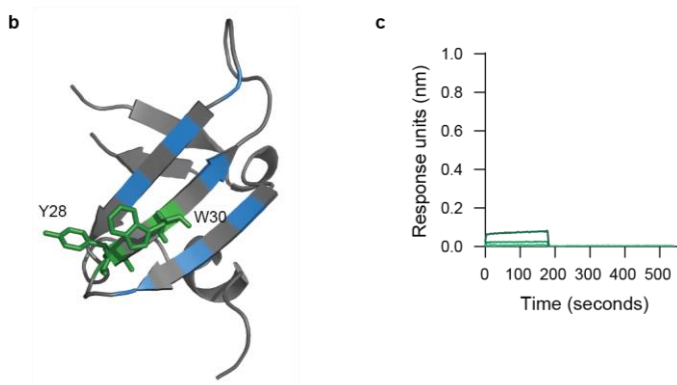

**Extended Data Figure 4. Scrambling of key R11.1.6 residues prevents binding to K-Ras. a,** Amino acid sequences of parental binder R11.1, affinity-matured R11.1.6, and scrambled control YW1. The nine residues of the Sso7d binding surface are depicted in blue; R11.1 framework mutations are shown in red. The two swapped residues of YW1 are indicated in green. **b,** Crystal structure of R11.1.6, in which residues are colored as in **a**, showing Y28 and W30 which are swapped in YW1. The C-terminus is slightly disordered. **c,** Binding of YW1 to immobilized GppNHp-loaded K-Ras G12D measured using bio-layer interferometry. Concentrations of YW1 curves from dark to light: 1000, 333.3, 111.1, 37, 12.3, 4.1, 1.4 nM.

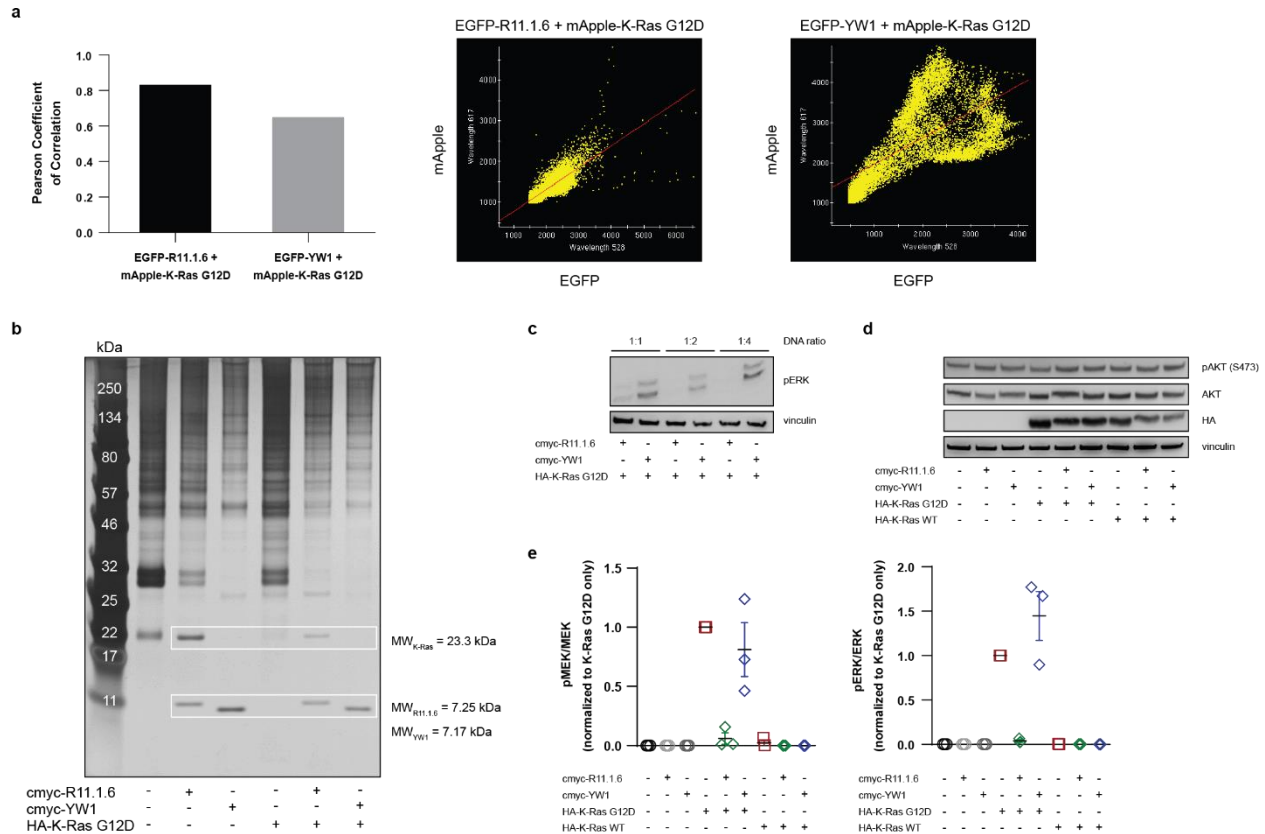

**Extended Data Figure 5. R11.1.6 co-localizes with K-Ras G12D in cells, specifically pulls down K-Ras, shows concentration-dependent inhibition of MAPK signaling, but does not affect the PI3K cascade. a**, Pearson coefficients of correlation and the respective scatter plots obtained from co-localization quantification of the merged images shown in Figure 4a. **b**, Silver stained gel of co-immunoprecipitation of cmyc-R11.1.6 in co-transfected HEK 293T cells. Anti-cmyc beads pulled down cmyc-R11.1.6 and cmyc-YW1 at the proper molecular weight (MW). Only cells transfected with R11.1.6 co-immunoprecipitate K-Ras. Higher molecular weight bands show non-specificity of anti-cmyc beads, apparent from the mock transfected lane. Results are representative of  $n = 2$  biological replicates. **c**, Concentration dependence of R11.1.6-mediated inhibition of phosphorylated ERK (pERK) in co-transfected HEK 293T cells. Increasing R11.1.6 transfected DNA reduces pERK (DNA ratio, K-Ras G12D:R11.1.6). Results are representative of

n = 3 biological replicates. **d**, Effect of R11.1.6 on phosphorylation of endogenous AKT (pAKT) at serine 473 via HA-K-Ras G12D-induced signaling in co-transfected HEK 293T cells, showing lack of inhibition of signaling by R11.1.6. Results are representative of n = 3 biological replicates. Full-length blots of the cropped ones shown here are given in Extended Data Figures 8 and 9. **e**, Quantification of pMEK/MEK and pERK/ERK signals of the three biological replicate blots, as represented by the images shown in Figure 4d. Data were normalized to the K-Ras G12D only transfected samples.



**a**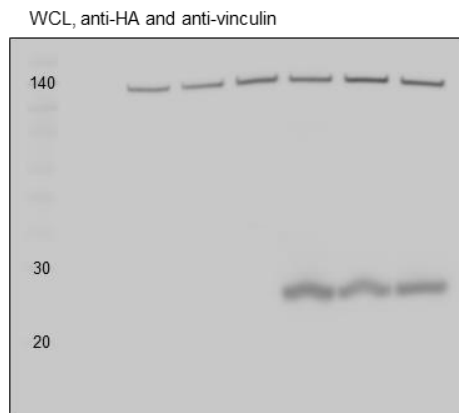

|            |   |   |   |   |   |   |
|------------|---|---|---|---|---|---|
| R11.1.6    | - | + | - | - | + | - |
| YW1        | - | - | + | - | - | + |
| K-Ras G12D | - | - | - | + | + | + |

**b**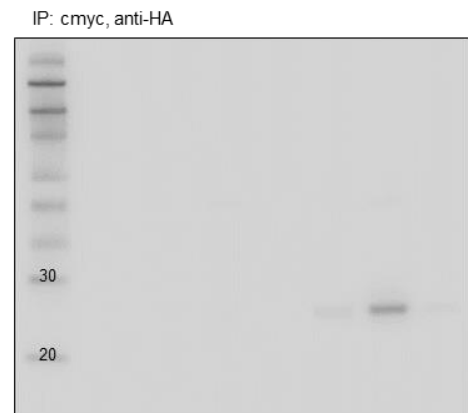

|            |   |   |   |   |   |   |
|------------|---|---|---|---|---|---|
| R11.1.6    | - | + | - | - | + | - |
| YW1        | - | - | + | - | - | + |
| K-Ras G12D | - | - | - | + | + | + |

**Extended Data Figure 6. Full western blots of Figure 4b. a**, Western blot of whole cell lysate (WCL) of HA-tagged K-Ras G12D with myc-R11.1.6/YW1 co-transfected HEK 293T cells. **b**, Western blot of myc immunoprecipitated samples of HEK293T cells co-transfected with HA-tagged K-Ras G12D and myc-R11.1.6/YW1. Results are representative of  $n = 2$  biological replicates. Molecular weights in kDa are indicated.

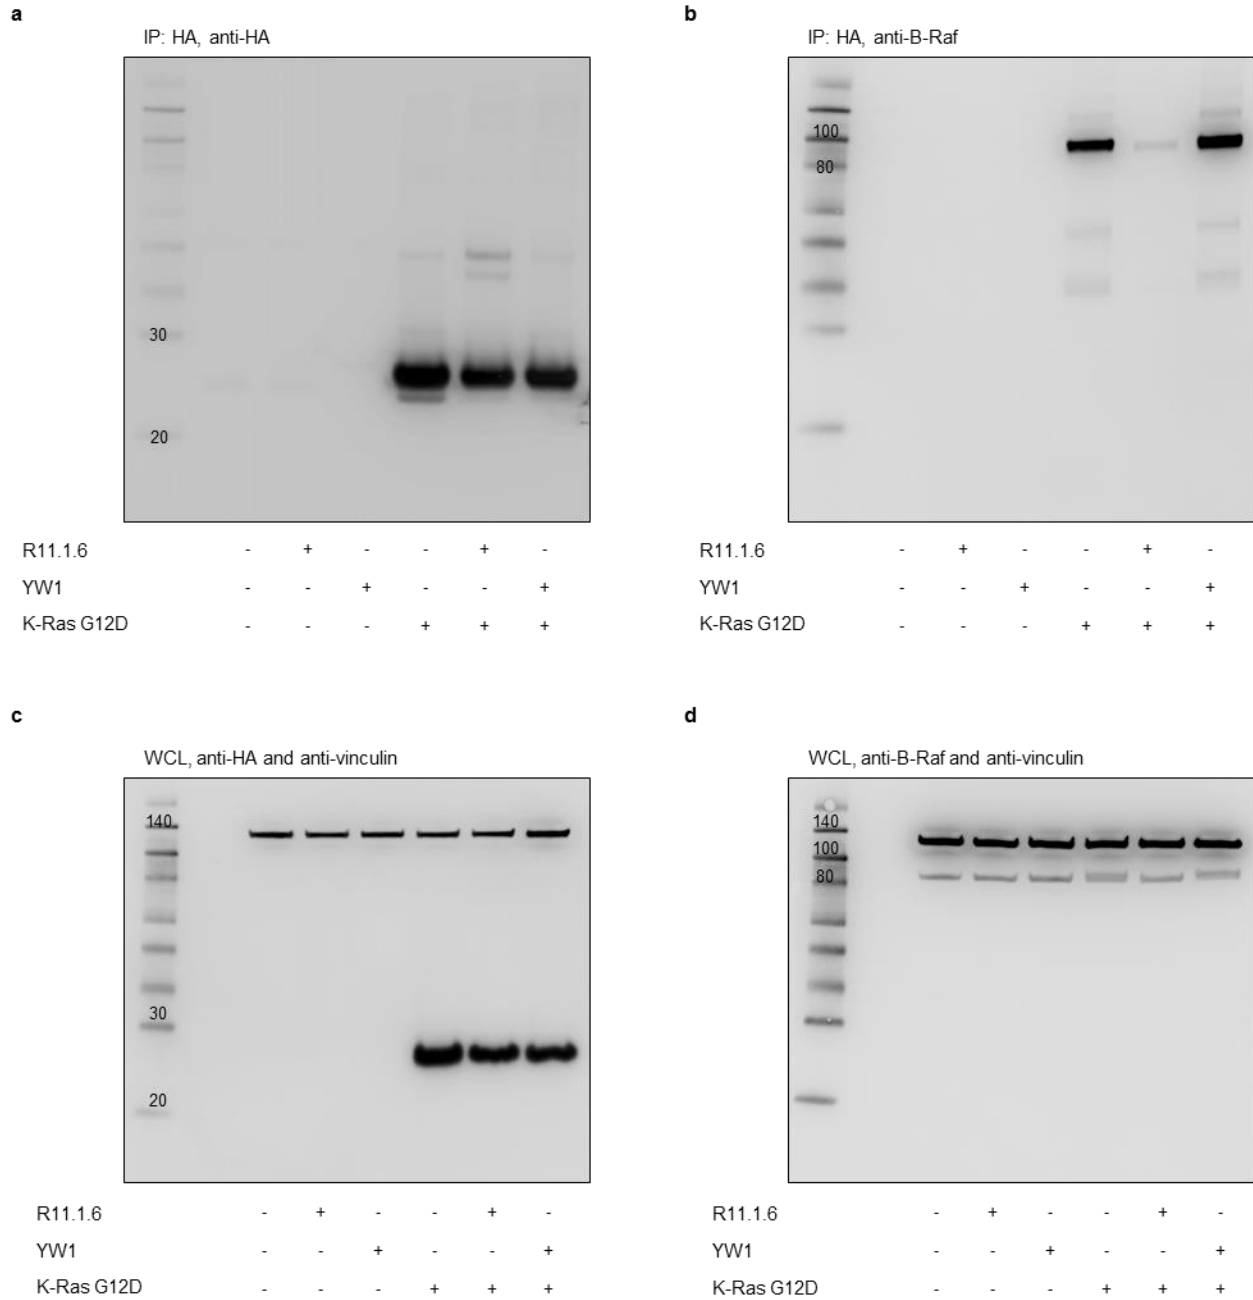

**Extended Data Figure 7. Full western blots of Figure 4c. a-b,** Western blots of HA immunoprecipitated samples of HEK293T cells co-transfected with HA-tagged K-Ras G12D and myc-R11.1.6/YW1. **c-d,** Western blots of whole cell lysate (WCL) of HA-tagged K-Ras G12D with myc-R11.1.6/YW1 co-transfected HEK 293T cells. Results are representative of n = 3 biological replicates. Molecular weights in kDa are indicated.

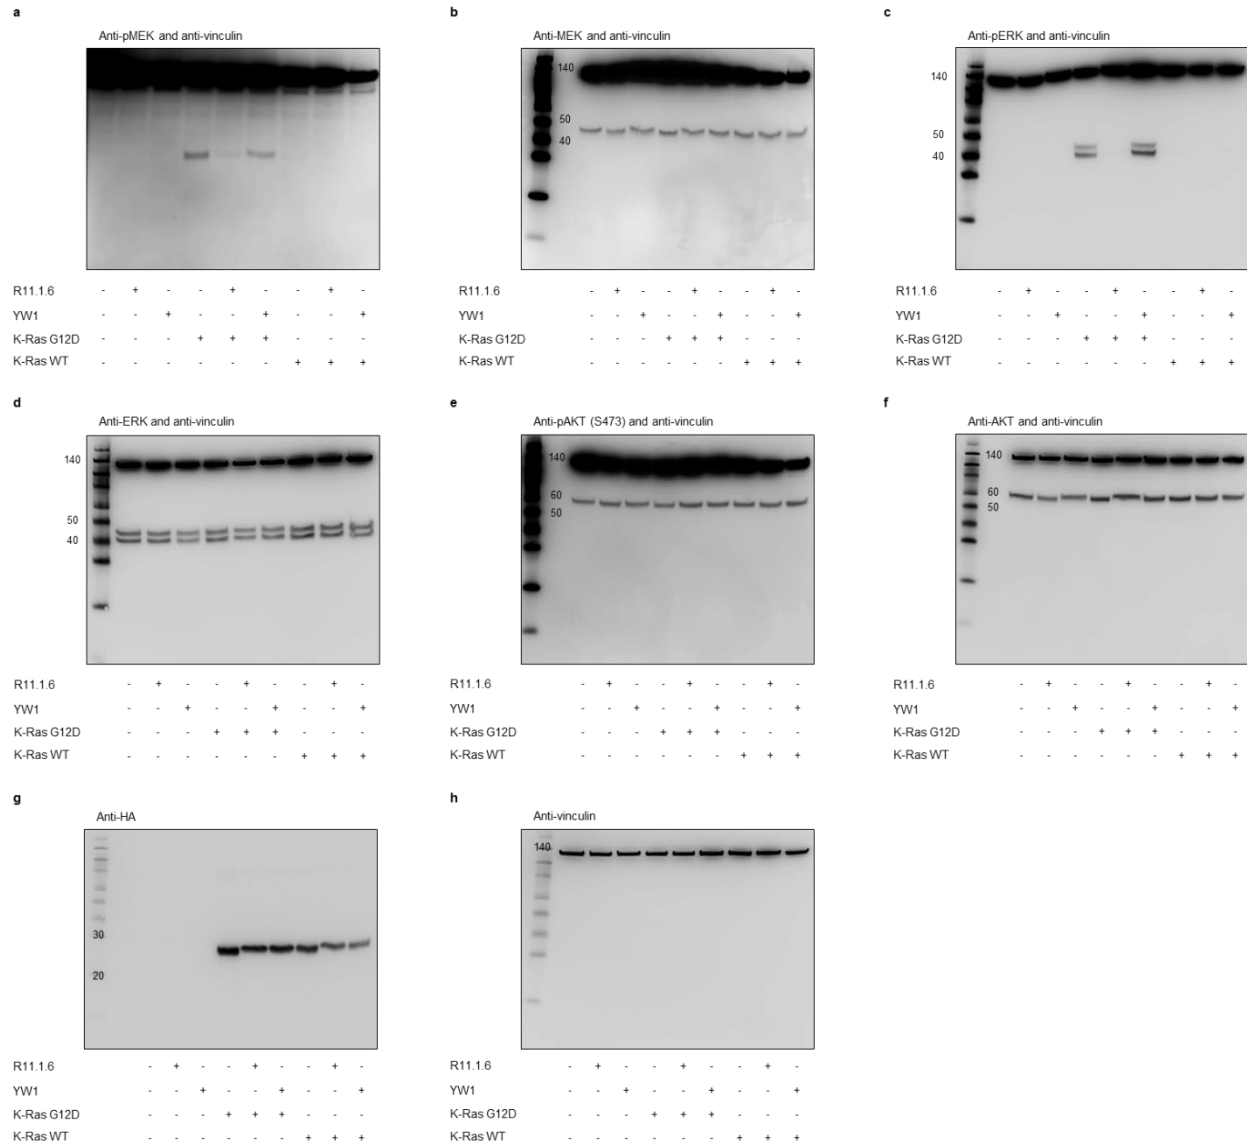

**Extended Data Figure 8. Full western blots of Figure 4d and Extended Data Figure 5d. a-h,** Western blots of whole cell lysates of HEK293T cells co-transfected with HA-tagged K-Ras G12D/WT and myc-tagged R11.1.6/YW1. Results are representative of n = 3 biological replicates. Molecular weights in kDa are indicated.

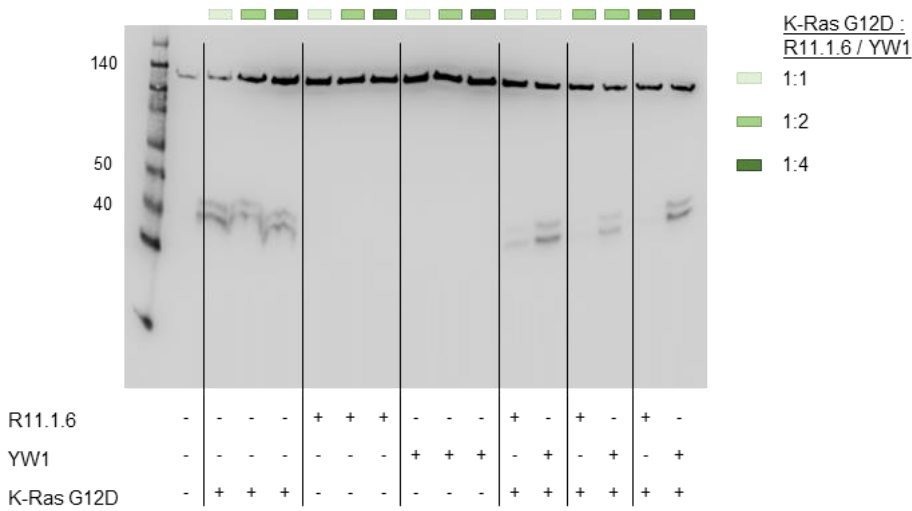

**Extended Data Figure 9. Full western blot of Extended Data Figure 5c.** Western blot against vinculin and pERK of whole cell lysates of HEK293T cells co-transfected with varying DNA ratios (indicated by green bars) of HA-tagged K-Ras G12D and cmyc-tagged R11.1.6/YW1. Results are representative of n = 3 biological replicates. Molecular weights in kDa are indicated.
